# Supplementary material
Source: PubMed Central journal article supplement (PMC4270203)
Supplement: NIHMS531072-supplement-supplement_1.pdf [file NIHMS531072-supplement-supplement_1.pdf]

## APPENDIX

Annual hypertension control rates within different patient samples in KPNC between 2001-2009.

eTable 1 below shows the yearly rate of hypertension control comparing data from an internal health plan-wide hypertension registry as compared with the NCQA HEDIS commercial sampling methodology.

**eTable 1. Annual hypertension control rates within KPNC using an internal hypertension registry compared with the NCQA HEDIS commercial sample between 2001-2009.**

| Year | Internal Hypertension Registry Control Rate |             |                    | NCQA HEDIS Hypertension Control Rate |             |               |
|------|---------------------------------------------|-------------|--------------------|--------------------------------------|-------------|---------------|
|      | Numerator                                   | Denominator | Rate (95% CI)      | Numerator                            | Denominator | Rate (95% CI) |
| 2001 | 83,909                                      | 234,852     | 35.7% (35.4-36.1%) | 193                                  | 443         | 44% (39-49%)  |
| 2002 | 127,169                                     | 265,701     | 47.9% (47.6-48.1%) | 238                                  | 455         | 52% (47-57%)  |
| 2003 | Data not available*                         |             | 56.4%              | 238                                  | 455         | 52% (47-57%)  |
| 2004 | Data not available*                         |             | 61.3%              | 268                                  | 472         | 57% (53-61%)  |
| 2005 | Data not available*                         |             | 71.2%              | 360                                  | 472         | 76% (72-80%)  |
| 2006 | Data not available*                         |             | 74.8%              | 346                                  | 472         | 73% (69-77%)  |
| 2007 | 249,577                                     | 327,673     | 76.2% (76.0-76.3%) | 245                                  | 321         | 76% (71-81%)  |
| 2008 | 257,399                                     | 336,425     | 76.5% (76.3-76.8%) | 258                                  | 321         | 80% (76-84%)  |
| 2009 | 269,128                                     | 344,815     | 78.0% (77.7-78.3%) | 258                                  | 321         | 80% (76-84%)  |

\*data not available for years 2003-2006

### KPNC Diabetes Registry Inclusion Criteria

The presence of diabetes mellitus was determined using a regional diabetes registry modeled after an approach described previously (see manuscript), which included members meeting any of the following criteria in the prior 24 months:  $\geq 2$  ambulatory diabetes-related
